# Supplementary material for: Engineering defective trimetallic metal–organic framework nanosheets for advanced water oxidation electrocatalysis
Source: Royal Society of Chemistry journal article supplement (doi:10.1039/d3dt01228j), 2023-01-01
Supplement: d3dt01228j1.pdf [file d3dt01228j1.pdf]

**Supporting Information for**  
**Engineering Defective Trimetallic Metal-Organic Framework**  
**Nanosheets for Advanced Water Oxidation Electrocatalysis**

Hui Xu <sup>a, b</sup>, Cheng Wang <sup>b</sup>, Guangyu He <sup>a\*</sup>, Haiqun Chen <sup>a\*</sup>

*<sup>a</sup> Key Laboratory of Advanced Catalytic Materials and Technology, Advanced  
Catalysis and Green Manufacturing Collaborative Innovation Center, Changzhou  
University, Changzhou, Jiangsu Province 213164, China*

*<sup>b</sup> College of Chemistry Chemical Engineering and Materials Science, Soochow  
University, Suzhou, 215123 P. R. China*

*Corresponding authors: hegy@cczu.edu.cn (G. He); chenhq@cczu.edu.cn (H. Chen)*

### **Chemicals**

Nickel(II) acetate tetrahydrate ( $\text{Ni}(\text{OAc})_2 \cdot 4\text{H}_2\text{O}$ ), iron(II) sulfate heptahydrate ( $\text{FeSO}_4 \cdot 7\text{H}_2\text{O}$ ), cobalt(II) sulfate heptahydrate ( $\text{CoSO}_4 \cdot 7\text{H}_2\text{O}$ ), manganese(II) sulfate monohydrate ( $\text{MnSO}_4 \cdot \text{H}_2\text{O}$ ), zinc(II) sulfate heptahydrate ( $\text{ZnSO}_4 \cdot 7\text{H}_2\text{O}$ ), cadmium(II) sulfate ( $\text{CdSO}_4 \cdot 3\text{H}_2\text{O}$ ), terephthalic acid (1,4- $\text{H}_2\text{BDC}$ ), N,N-dimethylacetamide (DMAC) were purchased from Sinopharm Chemical Reagent Co. Ltd (Shanghai, China). Other chemicals and solvents were obtained from commercial suppliers and used without further purification.

### **Characterizations**

The samples were examined by powder X-ray diffraction (PXRD), which was conducted on a X'Pert-Pro MPD diffractometer (Netherlands PANalytical) with a  $\text{Cu K}\alpha$  X-ray source ( $\lambda = 1.540598 \text{ \AA}$ ). The morphology of the products was studied by

transmission electron microscopy (TEM, HITACHI HT7700) and scanning transmission electron microscopy (STEM, FEI Tecnai F20). Scanning electron microscopy (SEM) images and energy dispersive X-ray spectroscopy (EDS) were taken with a HITACHI S-4700 cold field-emission scanning electron microscope operated at 15 kV. X-ray photoelectron spectra (XPS) were collected with an SSI S-Probe XPS Spectrometer.

### **Electrochemical measurements**

Electrochemical measurements were made using a three-electrode setup with a Hg/HgO electrode as the reference electrode and a graphite rod as the counter electrode, a glassy carbon (GC) disk electrode (5 mm in diameter) was used as the working electrode. The catalyst suspension was prepared by dispersing 5 mg catalyst containing 3.5 mg of MOF in 1 mL solution containing 0.97 mL isopropanol and 30  $\mu\text{L}$  0.5 wt. % Nafion solution followed by ultrasonication for 1 h. The above suspension (20  $\mu\text{L}$ ) was dropped on to the polished GC electrode and then dried at room temperature. The overpotential ( $\eta$ ) was calculated according to the following formula:  $\eta = \text{ERHE} - 1.23 \text{ V}$ . Linear sweep voltammetry (LSV) was recorded in an  $\text{O}_2$ -saturated 1.0 M KOH solution at a scan rate of  $5 \text{ mV}\cdot\text{s}^{-1}$  and room temperature to obtain the polarization curves. The cyclic voltammetry for 60 cycles is also operated for activating the working electrode. The stability tests were performed by chronopotentiometry at the current density of  $10 \text{ mA}\cdot\text{cm}^{-2}$ . The electrochemical double-layer capacitance ( $C_{\text{dl}}$ ) was determined from cyclic voltammograms measured in a non-Faradaic region at different scan rates ( $v = 10, 20, 30, \text{ and } 40 \text{ mV/s}$ ) in the

potential range 1.1 to 1.2 V versus RHE. The current differences at 0.05 V against scan rates were fitted to obtain the  $C_{dl}$ :  $C_{dl} = I_c/v$ , where  $C_{dl}$ ,  $I_c$ , and  $v$  are the double-layer capacitance ( $\text{mF}/\text{cm}^2$ ) of the electroactive materials, charging current ( $\text{mA}/\text{cm}^2$ ), and scan rate ( $\text{mV}/\text{s}$ ). Electrochemical impedance spectra (EIS) experiments were performed with the three-electrode cell system in 1M KOH at 25°C. The amplitude of the sinusoidal wave was 10 mV, and the frequency scan range was from 10 kHz to 100 mHz

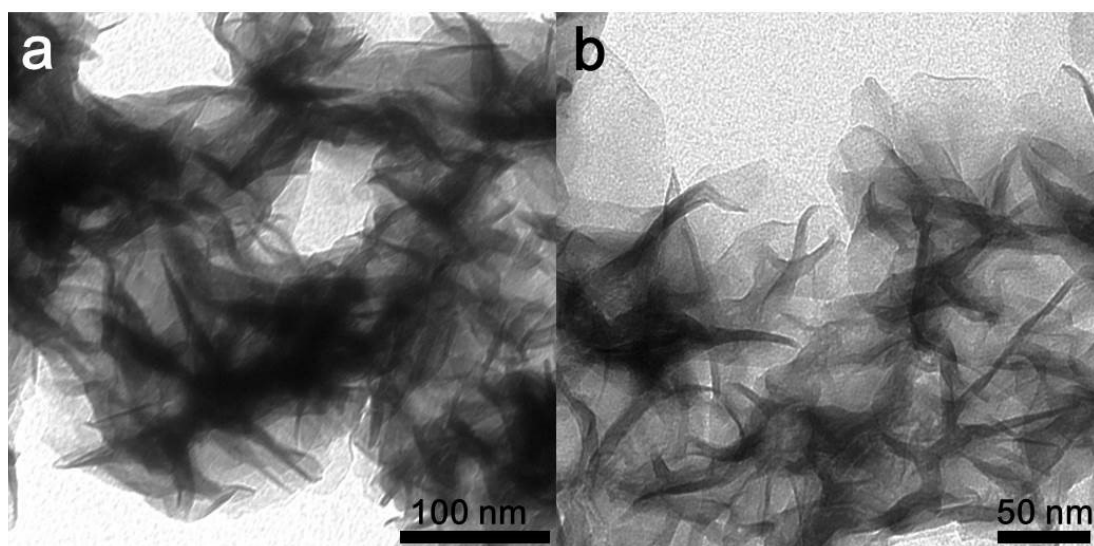

**Fig.S1** Additional TEM images of the NiFeZn MOF nanosheets.

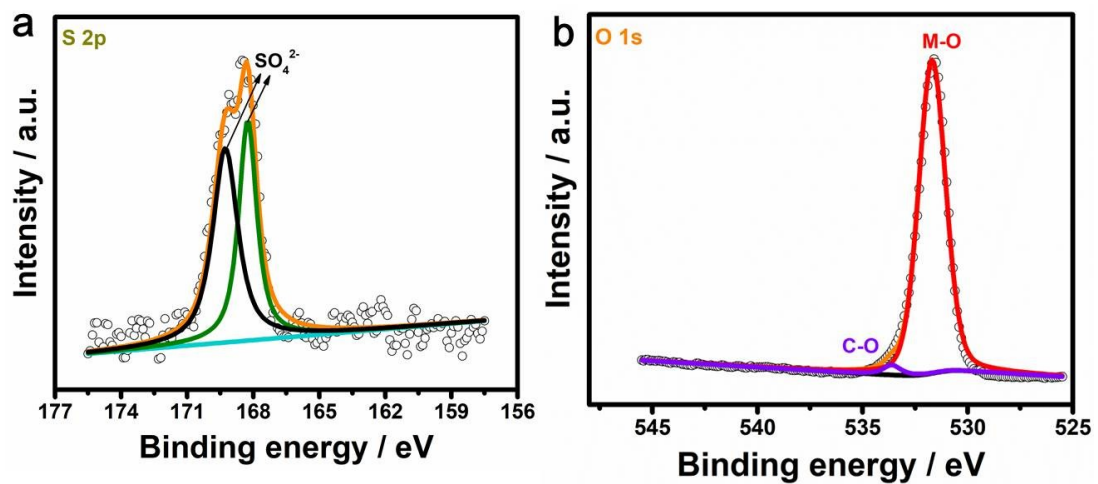

**Fig.S2** High-resolution XPS spectra of the (a) 2p and (b) 1s.

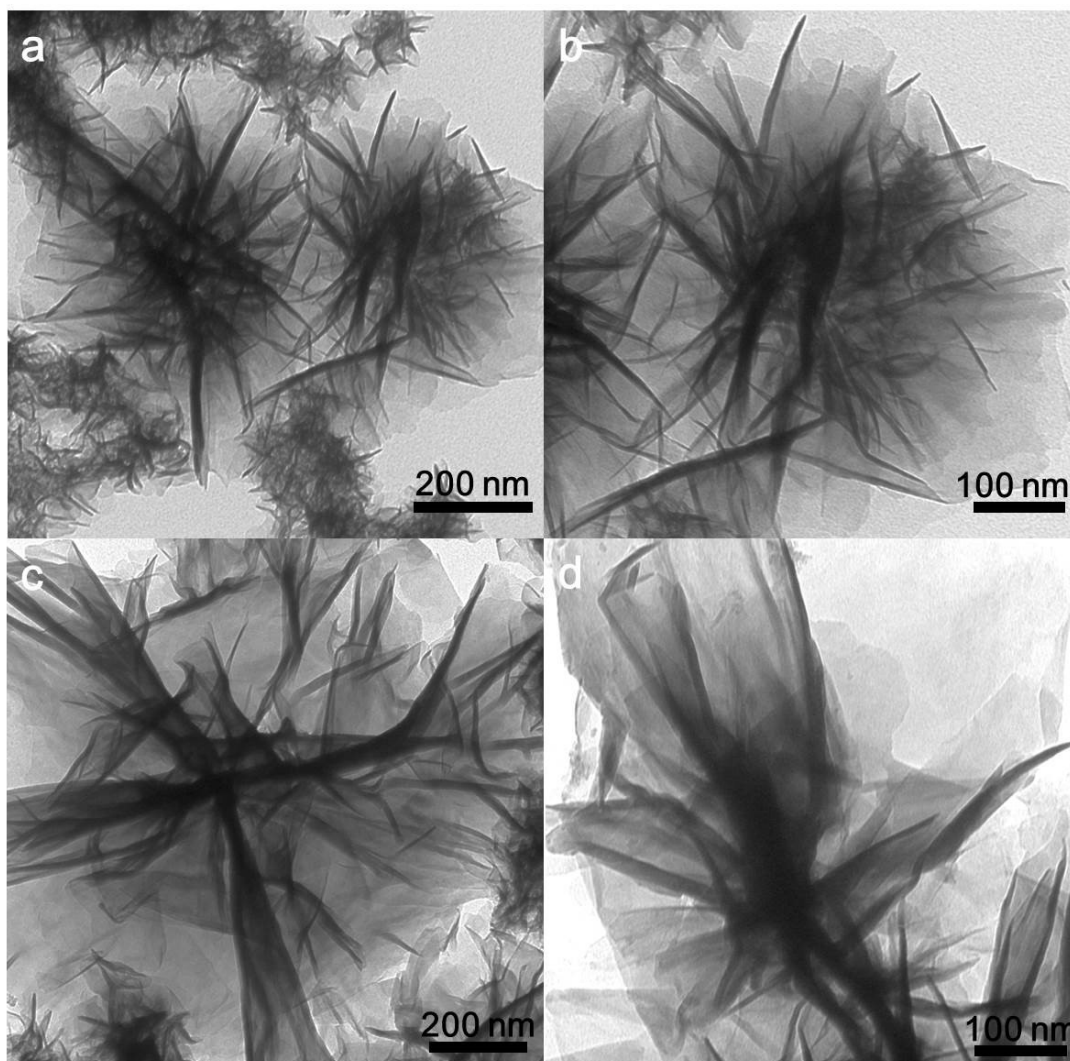

**Fig.S3** Representative TEM images of the (a, b) NiFeZn-1 and (c, d) NiFeZn-5 MOF nanosheets.

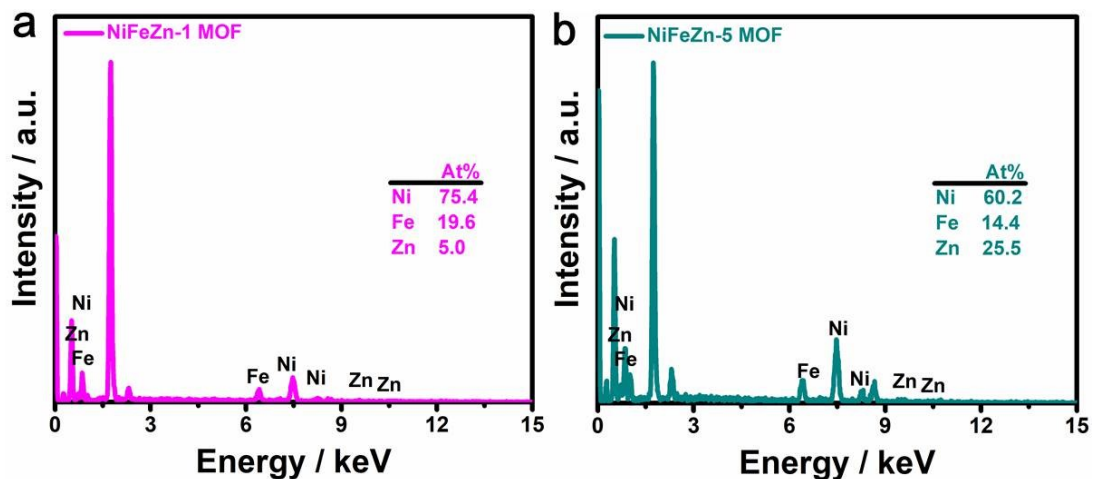

Fig.S4 SEM-EDX spectra of the (a) NiFeZn-1 and (b) NiFeZn-5 MOF nanosheets.

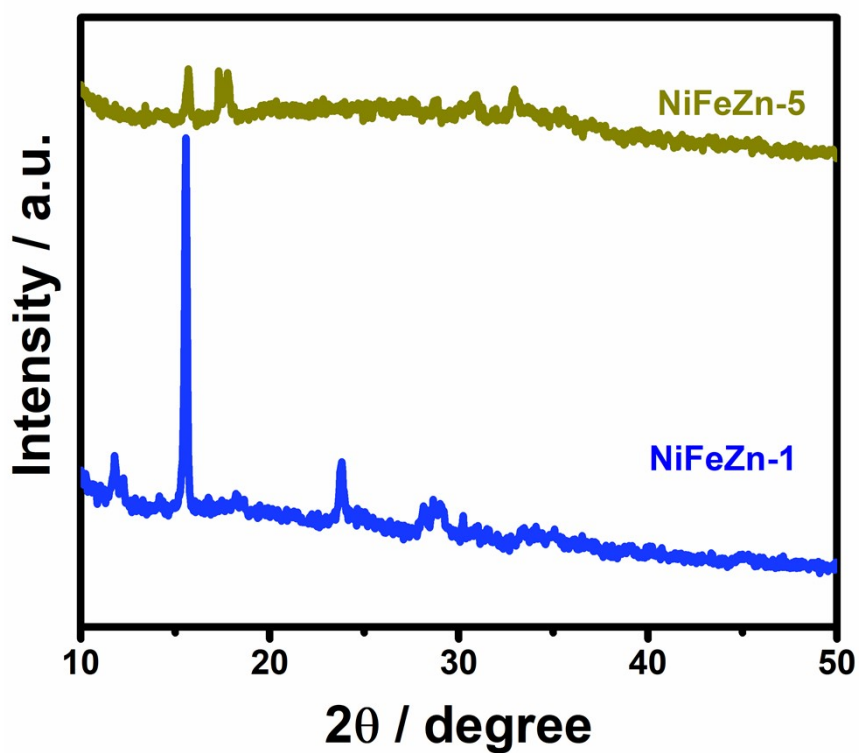

Fig.S5 XRD patterns of the (a) NiFeZn-1 and (b) NiFeZn-5 MOF nanosheets.

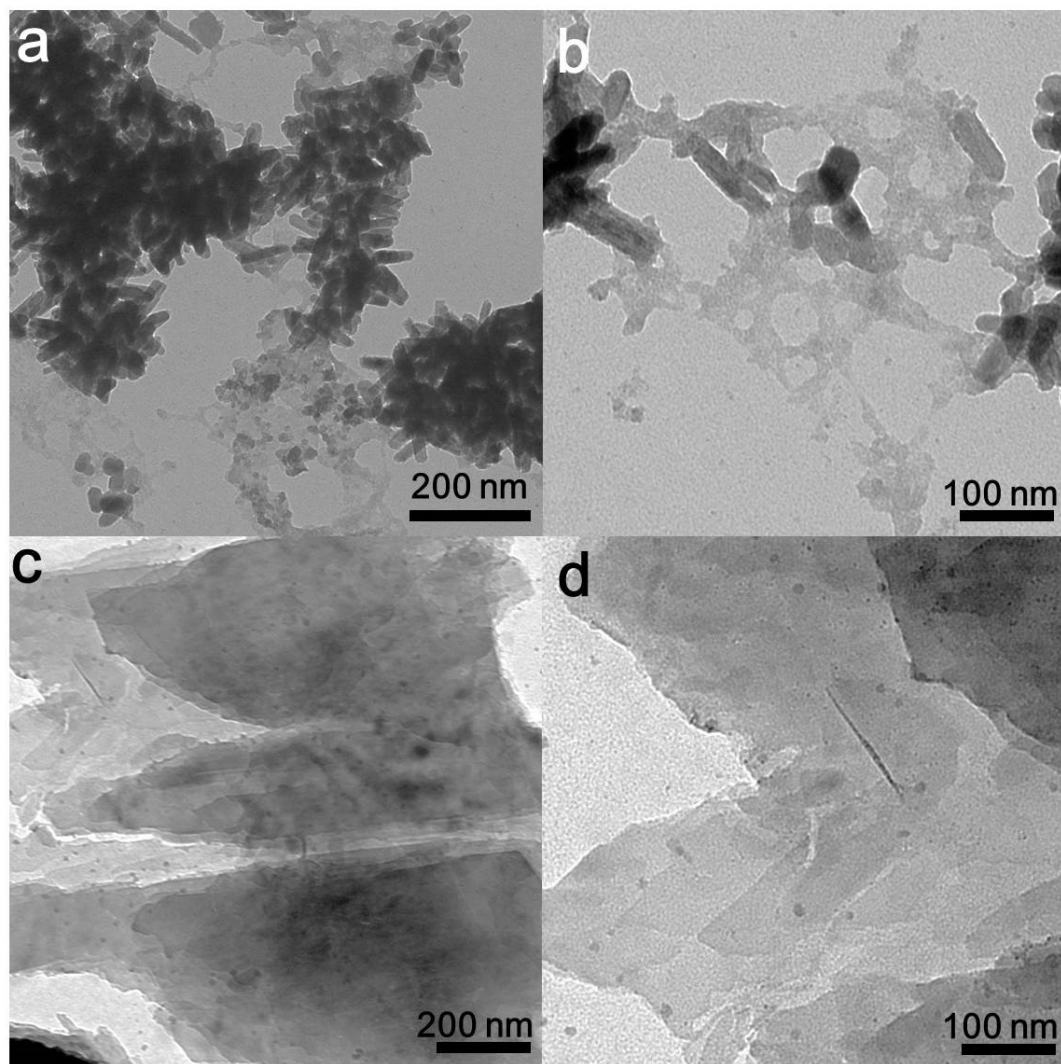

**Fig.S6** Representative TEM images of the (a, b) Fe MOF and (c, d) Ni MOF.

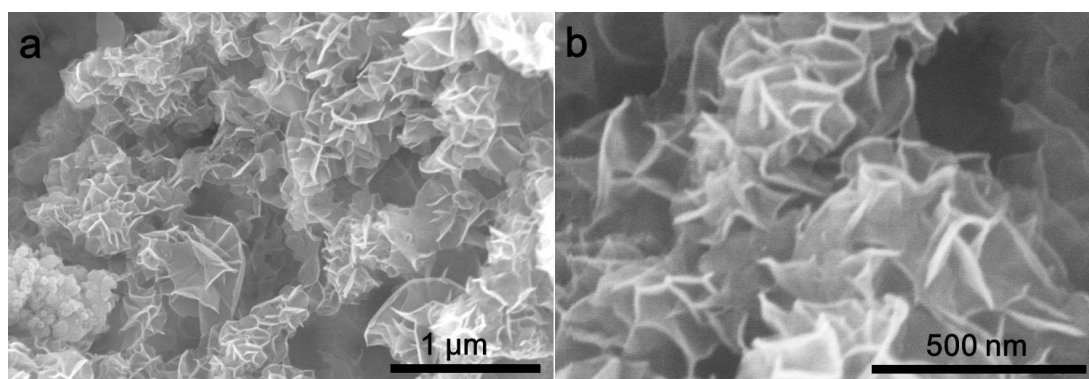

**Fig.S7** Representative SEM images of the NiFe MOF.

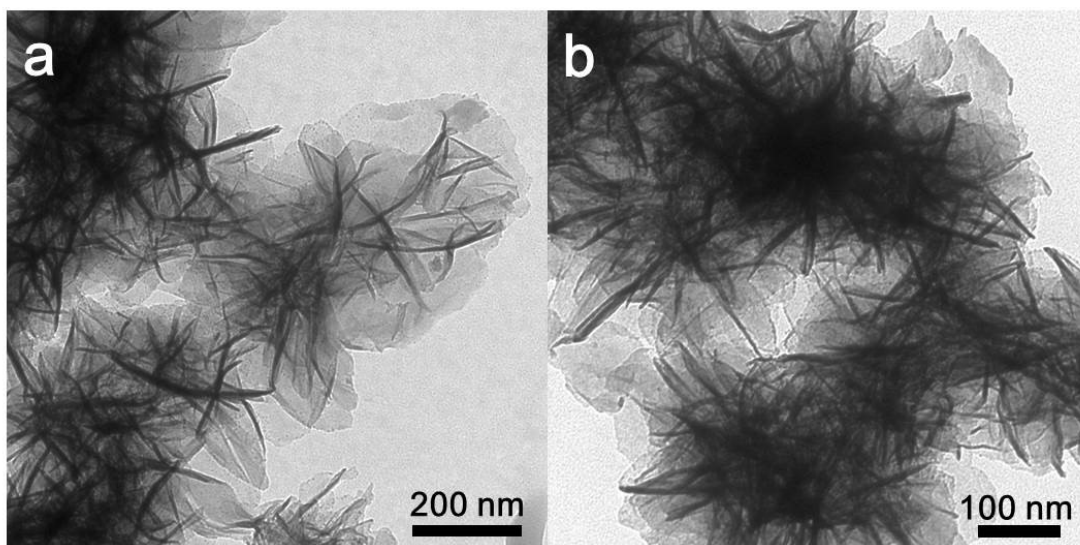

Fig.S8 Representative TEM images of the NiFe MOF.

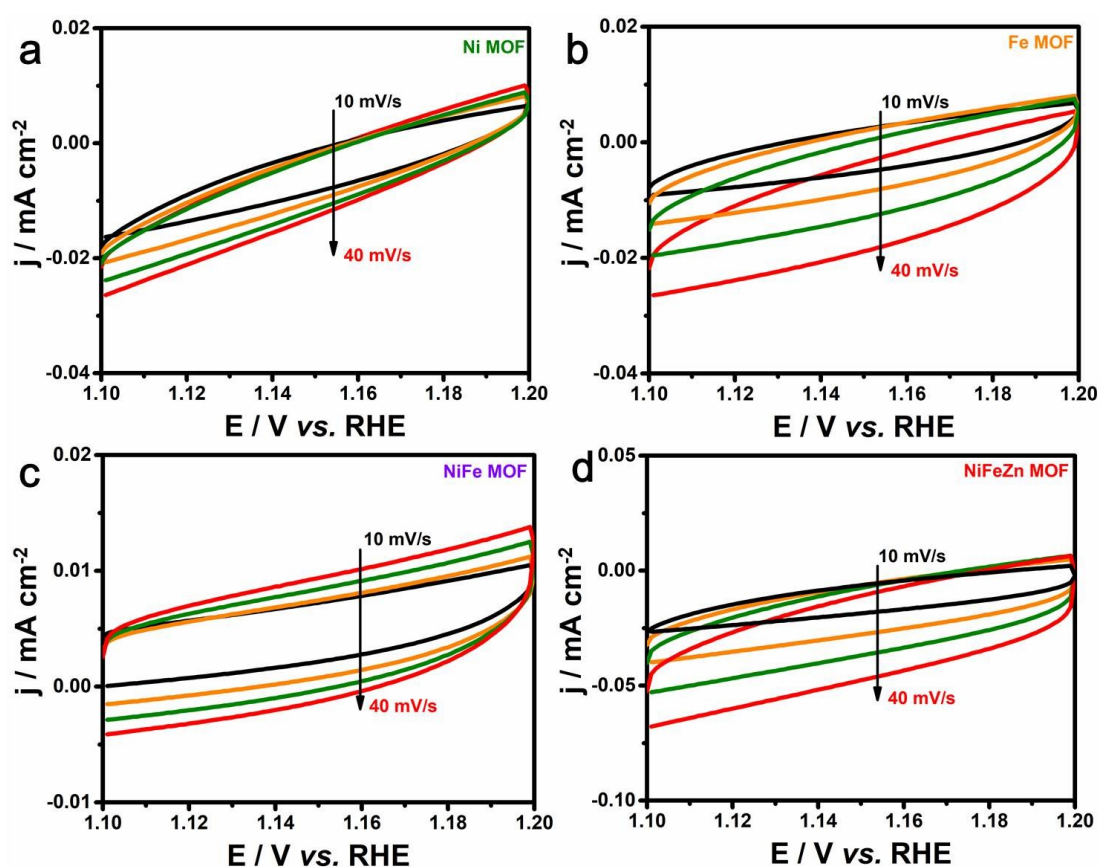

Fig.S9 CV curves of the (a) Ni MOF, (b) Fe MOF, (c) NiFe MOF, and (d) NiFeZn MOF with different scan rate.

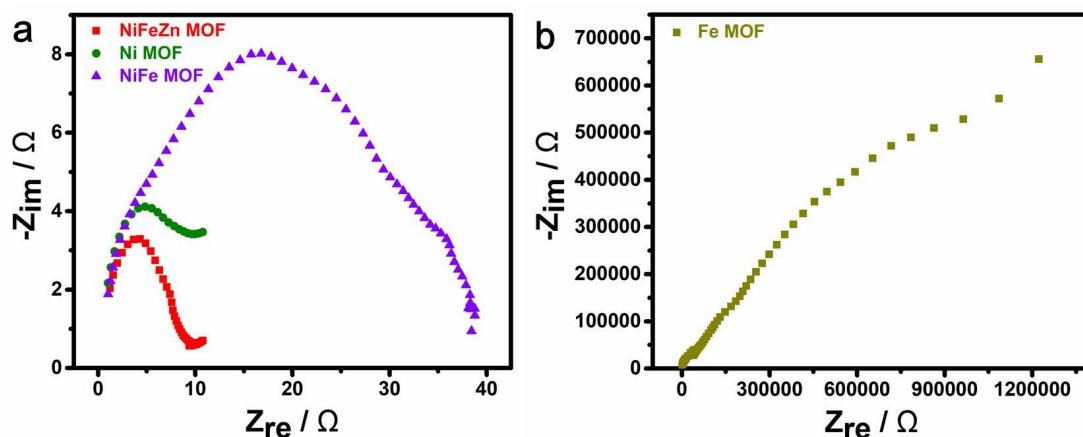

**Fig.S10** Nyquist plots of the (a) Ni MOF, NiFe MOF, NiFeZn MOF, and (b) Fe MOF, at the potential of 1.6 V versus RHE.

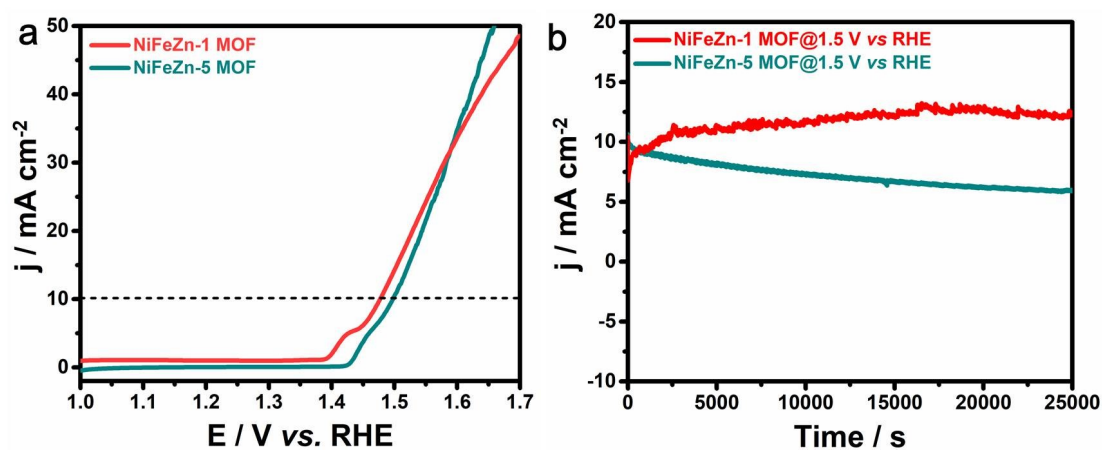

**Fig.S11** (a) LSV curves of the NiFeZn-1 MOF and NiFeZn-5 MOF in 1 M KOH solution at the scan rate of 5 mV/s. (b) CA curves of the NiFeZn-1 MOF and NiFeZn-5 MOF at the potential of 1.5 V vs RHE.



**Table S1** OER performance of different catalysts in alkaline water solution

| Catalyst                                  | $\eta@10 \text{ mA}\cdot\text{cm}^{-2}$ | Tafel slope ( $\text{mV}\cdot\text{dec}^{-1}$ ) | Reference |
|-------------------------------------------|-----------------------------------------|-------------------------------------------------|-----------|
| NiFeZn MOF                                | 233 mV                                  | 37.8                                            | This work |
| CoNi MOF                                  | 276                                     | 55.6                                            | 1         |
| NDA/MWCNTs-a                              | 285                                     | 73                                              | 2         |
| NiCo-MOF                                  | 310                                     | 106.3                                           | 3         |
| Fe–Ni LDH/MOFs                            | 255                                     | 24                                              | 4         |
| CoO/CoP-NC                                | 268                                     | 88                                              | 5         |
| Mo-(CoP <sub>2</sub> ) <sub>0.5</sub> -10 | 251                                     | 120.1                                           | 6         |
| Co <sub>2</sub> P@NPC                     | 300                                     | 69.5                                            | 7         |
| Fe-MIL-88B                                | 310                                     | /                                               | 8         |

### References

1. X. Zhang, J. Luo, K. Wan, D. Plessers, B. Sels, J. Song, L. Chen, T. Zhang, P. Tang, J. R. Morante, J. Arbiol and J. Fransaer, *J. Mater. Chem. A*, 2019, **7**, 1616-1628.
2. S. Kiran, G. Yasmeen, Z. Shafiq, A. Abbas, S. Manzoor, D. Hussain, R. Adel Pashameah, E. Alzahrani, A. K. Alanazi and M. Naeem Ashiq, *Fuel*, 2023, **331**.
3. Q. Liu, J. Chen, P. Yang, F. Yu, Z. Liu and B. Peng, *Int. J. Hydrogen Energy*, 2021, **46**, 416-424.
4. J. Huo, Y. Wang, L. Yan, Y. Xue, S. Li, M. Hu, Y. Jiang and Q. G. Zhai, *Nanoscale*, 2020, **12**, 14514-14523.
5. K. Chen, Y. Cao, W. Wang, J. Diao, J. Park, V. Dao, G.-C. Kim, Y. Qu and I.-H. Lee, *J. Mater. Chem. A*, 2023, **11**, 3136-3147.
6. W. Peilin, L. Gao, L. Dong, Z. Lin and L. Cui, *Int. J. Hydrogen Energy*, 2023, **48**, 14543-14553.
7. P. Wei, X. Sun, Z. He, F. Cheng, J. Xu, Q. Li, Y. Ren, J. He, J. Han and Y. Huang, *Fuel*, 2023, **339**, 127303.
8. P. Zhao, X. Hua, W. Xu, W. Luo, S. Chen and G. Cheng, *Catal. Sci. Technol.*, 2016, **6**, 6365-6371
